# Supplementary material
Source: PubMed Central journal article supplement (PMC8388836)
Supplement: aem.00915-21-s0001.pdf [file aem.00915-21-s0001.pdf]

Supplementary material:

**Chemical or genetic alteration of proton motive force results in loss of virulence of *Burkholderia glumae*, the cause of rice bacterial panicle blight.**

**Asif Iqbal<sup>1</sup>, Pradip R. Panta<sup>1</sup>, John Ontoy<sup>2</sup>, Jobelle Bruno<sup>2</sup>, Jong Hyun Ham<sup>2</sup> and William T. Doerrler<sup>1\*</sup>**

*<sup>1</sup>Department of Biological Sciences, Louisiana State University, Baton Rouge, LA, USA*

*<sup>2</sup>Department of Plant Pathology and Crop Physiology, Louisiana State University Agricultural Center, Baton Rouge, LA 70803, USA*

**\* Correspondence:**

William T. Doerrler

wdoerr@lsu.edu

**Keywords:** colistin; antibiotic resistance; lipopolysaccharide; membrane protein; proton motive force

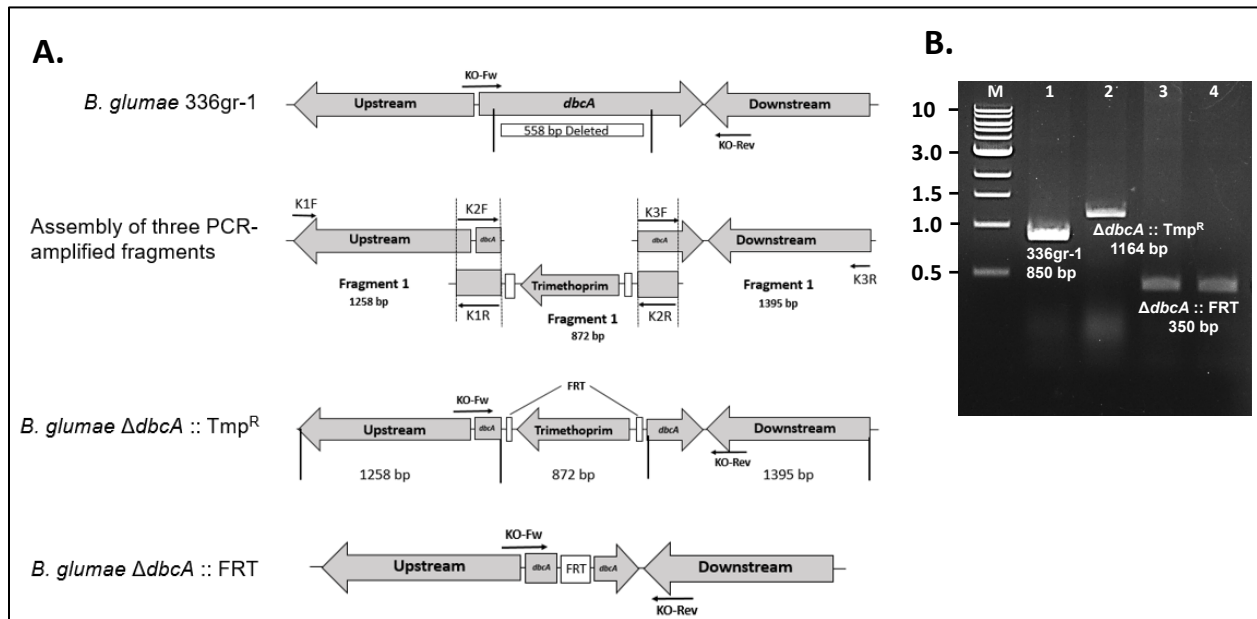

**Figure S1. Deletion of *B. glumae* 336gr-1 *bglu\_1g06460* (*dbcA*).** **A.** The illustration shows position of *dbcA* gene in *B. glumae* 336gr-1 genome and strategy for creating the deletion mutant. *dbcA* is located between *bglu\_1g06450* and *bglu\_1g06470*. The anneal site for primers K1F, K1R, K2F, K2R, K3F, K3R, KO-FW, and KO-REV are shown. The K1R, K2F, K2R, and K3F primers contain homology sequences are highlighted with parallel lines. Genes are not drawn to scale. **B.** Agarose gel stained with ethidium bromide shows the confirmation of PCR-amplified DNA fragments using KO-FW, and KO-REV primers from parental strain 336gr-1, trimethoprim resistant mutant strain ( $\Delta\text{dbcA}::\text{Tmp}^R$ ), and trimethoprim sensitive mutant strain ( $\Delta\text{dbcA}::\text{FRT}$ ).

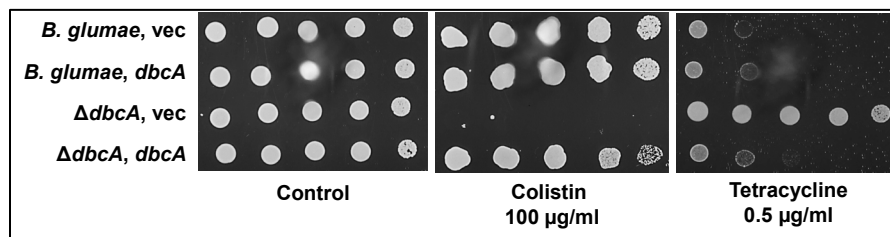

**Figure S2. Tetracycline resistance of *B. glumae*  $\Delta\text{dbcA}$ .** Serially  $\log_{10}$  diluted cells of *B. glumae* 336gr-1 and  $\Delta\text{dbcA}$  transformed with control vector (vec) and pSC501 (*dbcA*) were spotted and grown on MH2 agar medium containing 100  $\mu\text{g/ml}$  trimethoprim alone or with either 100  $\mu\text{g/ml}$  of colistin or 0.5  $\mu\text{g/ml}$  tetracycline.

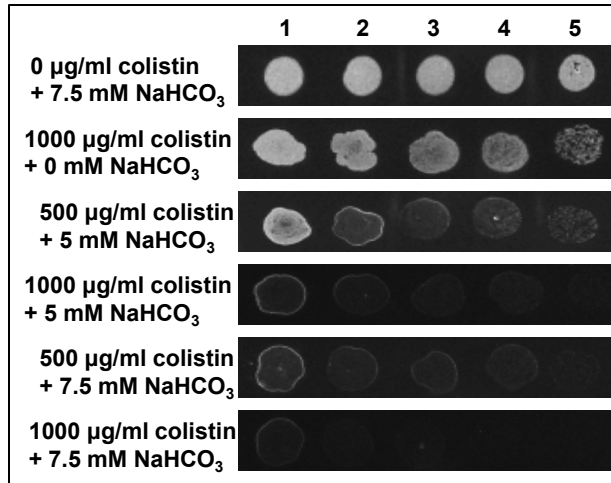

**Figure S3. Colistin sensitivity of wild type *B. glumae* 336gr-1 in the presence of  $\text{NaHCO}_3$ .** Serially  $\log_{10}$ -diluted cells of *B. glumae* 336gr-1 was spotted and grown on MH2 agar buffered with 70 mM Tris to pH 7.35 containing 0, 5, or 7.5 mM sodium bicarbonate and 0, 500, or 1000  $\mu\text{g/ml}$  colistin as indicated and incubated at 37°C for 48 hours.

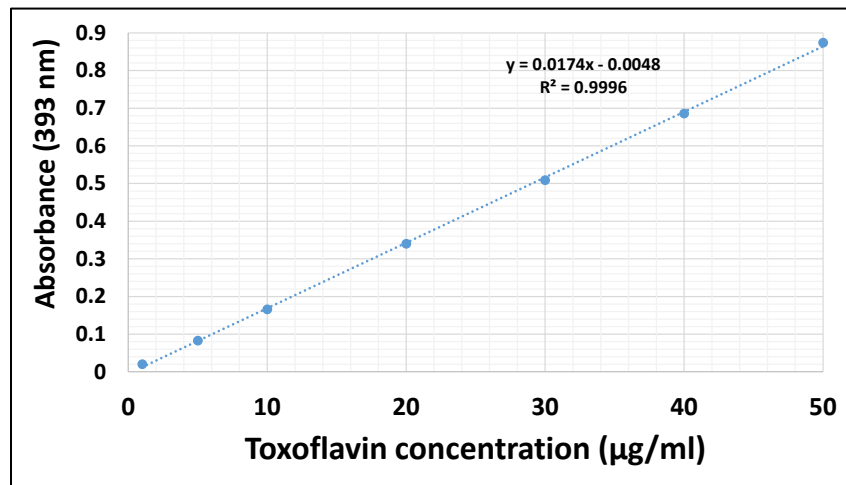

**Figure S4. Standard curve for toxoflavin assay.**
